# Supplementary material for: The Application of Ultra-High-Performance Liquid Chromatography Coupled with a LTQ-Orbitrap Mass Technique to Reveal the Dynamic Accumulation of Secondary Metabolites in Licorice under ABA Stress
Source: Molecules. 2017 Oct 20;22(10):1742. doi: 10.3390/molecules22101742 (PMC6151399; doi:10.3390/molecules22101742)
Supplement: Supplementary file 1 [file molecules-22-01742-s001.xls]

## Sheet: Sheet1
Name	Licoriceglycoside B	Licoriceglycoside A	Isoliquiritigenin	Licochalcone A	Neoisoliquiritin	Isoliquiritin	Neolicuroside	Uralenin	Liquiritigenin	Liquiritin	Naringenin	Liquiritin apioside	Glabridin	Catechin	Luteolin	Kaempferol	Uralene	Trihydroxyflavone	Topazolin	Licoricone	Ononin	Licoisoflavone A	semilicoisoflavone B	Licoisoflavone B	Formononetin	Genistein	Gancaonin G	Uralenol	Neouralenol	Rutin	Quercetin	Isoquercitrin	Quercitrin	Caffeic acid	Ferulic Acid	Protocatehuic acid	Protocatechuic aldehyde	Trans-Isoferulic acid	Licopyranocoumarin	Glycyrol	Isoglycyrol	Isoglycyrrhizin	Glycyrrhizin	Licorice-saponin G2	Licoricesaponin A3	Licoricesaponin B2	Licoricesaponin J2	Licoricesaponin E2	Oleanolic acid
CG1	-0.83503	-0.99131	-0.99557	1.00797	-0.96483	-0.96877	-0.68072	-0.13376	-0.73318	1.05725	-0.88967	-0.95085	1.61541	-0.94938	-0.71962	-0.94954	-1.01568	-1.07296	-0.90566	-0.9048	-0.21086	-0.6867	-0.57051	-0.67397	-2.01475	0.12197	-0.93229	0.96033	-0.35293	-0.9553	-0.95618	-0.88347	0.88735	-0.84764	-0.97244	-0.81763	0.64977	-0.0774	-0.06108	-0.62465	1.04484	0.37686	-0.66583	0.77649	-1.02632	-0.04862	-1.02579	0.61308	-1.0271
CG2	-0.33602	-0.80199	-0.98903	1.09408	-0.95593	-0.96074	-1.23427	2.27314	-0.91367	1.34567	-0.84253	-0.93644	-0.61474	-0.9303	0.00184	-0.96424	-0.93352	-1.15293	-0.80124	-0.91438	-0.75923	-1.20886	1.15902	-0.52987	-1.37408	-0.92119	0.88102	1.2074	-1.25688	-0.98404	-0.99115	-0.97502	1.16546	-1.02641	-0.98584	-0.50979	-1.22309	-0.82996	-1.29796	-1.20515	0.43048	-1.14075	1.5324	-1.13964	-1.00545	0.29927	-0.94993	1.11472	-1.00496
CG3	-1.46963	-1.17385	-1.00121	0.73367	-1.01774	-0.96175	-0.59795	-1.7731	-0.88767	0.4311	-0.91537	-0.91616	-0.91057	-0.85953	-0.69459	-0.92571	-1.04497	-0.77559	-0.46152	-0.86595	-0.82879	-0.8976	-0.51098	-0.85205	-0.93283	-0.94507	0.3923	1.01022	-0.71318	-0.9832	-0.99356	-0.98687	0.88969	-0.89579	-1.00891	-0.27216	-0.40196	0.20241	-1.0282	-0.81541	1.10901	0.6697	0.60476	0.93138	-0.93385	-0.54795	-0.8249	1.02667	-0.99926
CG4	-0.97551	-0.80552	-1.01679	0.90911	-0.94145	-0.98874	-0.83463	-0.36369	-1.16412	0.72309	-0.92637	-0.9736	2.15933	-0.85553	-1.1369	-0.97307	-0.85418	-0.5011	-1.02197	-0.85133	-0.96479	0.11248	1.17958	-0.76322	-0.2963	-1.05806	-1.14221	0.7034	-0.51588	-0.93815	-0.90174	-0.87664	1.16674	-1.07925	-0.9581	-0.47193	-0.79044	-1.37819	-1.65166	-0.68177	1.24775	0.43104	-0.94381	-0.52514	-0.90562	-0.02821	-0.88195	1.13607	-0.97008
CG5	-0.45885	-0.97113	-0.98573	0.81771	-0.96476	-0.9482	-1.25437	-0.57298	-0.95658	0.98328	-1.01502	-0.9094	0.68924	-1.02255	-0.69561	-0.90471	-0.93721	-1.18685	-1.39647	-0.90754	-0.13154	0.11228	1.40896	-0.6942	0.87176	-0.36678	-0.90083	0.99514	-1.03062	-0.97933	-0.95957	-1.06214	0.85	-0.94747	-0.97125	-1.23831	1.04479	-1.0516	-0.97285	-1.26221	0.6147	1.59286	0.36508	-1.28798	-0.93528	-0.30051	-0.94003	1.03534	-0.9916
CG6	-0.66822	-1.08203	-0.90049	1.00854	-1.02739	-0.96877	-0.83817	-0.03898	-0.79425	0.53933	-0.93387	-0.94171	0.78744	-0.9354	-1.1636	-0.93678	-0.97747	-0.41692	-1.06413	-0.95447	-0.27511	-1.03373	2.50653	-0.49418	-0.33055	-0.60667	1.56145	0.64416	-1.19953	-0.97283	-0.90438	-0.8704	1.05938	-0.80349	-1.02673	-1.37247	1.0187	-1.16059	-0.18305	-0.67073	1.00226	-0.09094	1.18244	0.64502	-1.00136	-0.83228	-0.92971	0.82054	-1.02296
CG7	-0.51103	-0.74182	-0.91054	1.14178	-0.95978	-0.95001	-0.79679	-0.10036	-0.96642	1.27688	-0.83354	-0.93384	0.96866	-0.99497	-0.46496	-0.94294	-0.95217	-0.55898	-0.70951	-0.94853	-0.50914	1.19989	1.68184	-0.87415	1.55825	0.3793	0.72806	1.18254	-1.05433	-0.94554	-0.97179	-0.96276	0.82827	-0.8846	-0.98403	-1.57298	-1.17503	0.99536	-0.31847	-0.8098	0.43903	-0.78838	-0.84256	-1.00817	-0.97906	-0.6892	-1.03867	0.76051	-0.9303
CG8	-0.17678	-0.98948	-0.91961	1.54782	-0.92019	-0.97688	-0.54928	1.27671	-1.04841	0.81935	-0.91495	-0.98266	-0.43558	-0.89271	-0.53044	-0.9466	-0.76293	-1.36652	-0.89879	-0.83552	-0.6571	0.16899	0.56632	-0.52536	-0.46422	-0.47852	0.3923	1.11086	-1.07665	-0.93691	-0.86822	-0.84548	0.8911	-1.04741	-0.98508	0.12555	-1.11781	0.28019	-0.61544	-1.20194	1.03058	-1.3555	1.00056	-1.37097	-0.91482	-0.5728	-1.08632	1.17943	-0.92916
CG9	-0.85947	-0.89468	-0.94337	0.78217	-0.95278	-0.96226	-0.93946	0.41996	-1.00253	1.2387	-0.93602	-0.94113	1.2821	-0.94415	-1.20807	-0.89974	-0.54137	-1.39016	-0.39457	-0.97014	-0.29789	2.03085	-0.64898	-0.88582	1.38586	-1.17447	-0.16859	1.05717	-0.6261	-0.93815	-0.9759	-0.85543	0.82921	-1.07758	-0.94144	-1.36916	1.05329	0.3361	-1.60327	-1.59203	1.35038	1.59774	-1.18313	0.46872	-0.90746	-0.31097	-1.10195	0.83388	-0.93769
CG10	-0.06405	-1.10872	-1.0532	0.64899	-0.94158	-0.95523	-1.44749	-0.03809	-0.99211	0.75914	-0.92143	-0.94319	-0.64924	-0.85524	-0.7167	-0.95086	-1.07209	-0.66266	-0.94517	-0.91241	-0.71784	1.71219	-0.51518	-0.56749	-0.7488	-1.08414	-0.14144	1.09001	-1.07734	-0.95729	-0.89205	-0.97391	0.98207	-0.91476	-0.96897	-1.38478	1.52713	-0.34835	-1.76296	-0.2408	1.28442	1.89082	-0.84256	-0.10418	-0.91257	0.7353	-0.95121	0.68713	-0.97265
CG11	-1.43968	-0.9793	-1.01666	0.95708	-0.95968	-0.97063	-0.52721	1.57025	-0.99613	1.01792	-0.90065	-0.98423	1.28056	-0.95821	-0.61779	-0.98161	-0.89222	-1.06194	-1.08603	-0.943	-0.10538	1.70914	0.52047	-0.52769	0.81678	-1.10738	1.80581	0.99309	-1.29285	-0.96348	-0.95608	-0.98597	1.19588	-1.11978	-0.94859	-0.43352	0.61245	0.24852	-0.49563	-0.15428	0.67049	-1.3821	1.3461	0.62757	-1.11715	0.49832	-0.95115	0.76051	-0.9795
CG12	-1.01241	-0.78773	-0.93329	1.75507	-1.00672	-0.98874	-0.13328	-0.22203	-0.79263	0.57049	-1.01493	-0.93596	0.96773	-0.94228	0.03532	-0.92828	-1.06696	-1.17661	-0.45886	-0.84377	-0.2167	-1.4581	2.29474	-0.57424	-0.98145	-0.39343	-0.89678	1.00988	-0.86565	-0.98279	-0.88381	-0.98175	0.89177	-1.08342	-0.98025	-0.13689	-0.96695	-1.16116	-0.67743	-0.35149	0.42424	1.59994	-1.06329	-1.13964	-0.91073	0.76512	-0.95304	1.18076	-0.9898
CG13	-1.62667	-1.11432	-0.88317	0.39985	-0.91374	-0.99211	-1.42384	-1.53136	-0.98584	1.30737	-1.00505	-0.90645	-1.30999	-1.00213	-1.26668	-0.97245	-0.86346	-1.06194	-0.22916	-0.90315	-0.43704	0.14177	0.6674	-0.592	-1.02267	-1.2198	1.0528	0.95259	-1.37046	-0.9616	-0.82707	-0.86226	1.16444	-0.94614	-0.97392	-1.36824	0.08163	-1.0163	0.11067	-0.83381	1.12091	1.59774	-0.87036	0.19527	-0.90562	-0.28664	-0.84328	1.11339	-0.91308
CG14	-1.01193	-0.97673	-1.01683	0.68243	-0.9651	-0.96413	-1.23309	-0.15308	-1.08451	0.93014	-0.91054	-0.89409	0.75372	-0.89925	-0.61833	-0.90317	-0.92453	-0.49814	-1.38914	-0.88104	-0.43758	-0.95297	-0.59913	-0.51388	-0.70579	-1.49653	1.41502	0.79146	-0.94726	-0.98516	-1.04575	-0.84307	0.95245	-0.80389	-0.98508	0.05148	0.67558	-1.20716	-0.08411	-1.41572	1.1436	-0.63073	-0.82581	-1.31799	-0.97824	-0.07739	-1.02866	1.11672	-1.02391
CG15	-1.50353	-1.11588	-1.00425	0.81821	-0.99405	-0.99399	-0.94143	2.25046	-0.93934	1.37048	-0.9051	-0.95848	-0.80942	-0.93663	-1.44189	-0.98292	-0.97457	-1.18754	-1.34646	-0.90547	-0.05572	0.14052	0.58066	-0.49743	-0.36262	-1.27371	-1.62688	0.86186	-0.7606	-0.97853	-0.99629	-0.85001	0.85648	-1.00811	-0.92636	0.65834	0.65142	-1.47434	-1.02557	-1.31166	1.35779	-0.90868	-1.06458	-0.11832	-0.9584	-0.36302	-1.09786	0.84656	-0.9956
ABA1	0.8977	0.79475	0.82283	-0.9154	0.68186	1.00771	1.03333	-0.28029	1.04421	-0.9262	1.3341	1.50936	-0.25773	0.73427	0.39577	0.961	1.19017	0.84415	1.33582	0.91961	1.50456	0.59778	-0.51499	2.66776	-0.32966	1.06341	-0.38721	-0.78214	1.34983	1.09371	0.44906	1.09428	-0.85648	1.18744	0.86011	1.1347	1.0837	1.38364	1.26129	0.59284	-0.88298	-0.63049	-0.86465	1.44395	0.88504	1.52106	0.98359	-0.63501	0.84362
ABA2	1.38126	1.09579	0.85934	-1.02943	1.00118	0.95449	0.36332	-0.19284	1.03127	-0.99102	1.04024	0.96147	-0.45219	0.73418	1.60008	1.20993	0.80665	1.14417	0.61003	1.52473	1.67286	0.77431	-0.52359	0.24677	-0.50472	1.10879	1.82704	-1.14208	0.64652	0.70434	0.67352	1.73712	-0.88783	0.71328	1.11013	-0.06228	1.0837	1.63597	-0.1982	1.62857	-0.8322	-0.15976	-0.51506	-0.89974	0.98958	-1.2704	1.08474	-0.56763	0.96223
ABA3	1.11796	1.21806	0.588	-0.90174	0.66696	0.95752	0.42618	-0.03574	1.43087	-1.05484	0.99527	1.431	-0.79082	0.2233	0.00811	0.97667	1.18837	0.91237	1.09647	1.39053	-0.79827	-1.19293	-0.61236	1.6847	0.35175	0.45388	-0.39519	-1.1405	0.65036	1.21656	0.70958	1.62105	-1.0983	1.17899	0.76241	1.59232	-1.46173	-0.25775	1.42515	0.31388	-1.1161	-0.45406	-0.87367	1.52859	0.83348	1.7311	1.251	-0.90317	0.79875
ABA4	1.2146	0.86152	1.09418	-0.97393	1.38262	0.96614	1.04003	0.35148	0.71009	-0.74224	0.71442	0.93265	-0.4701	1.43966	1.68583	0.59013	0.85254	0.68234	0.45528	0.58843	3.19537	-0.46239	-0.8586	2.61574	-0.29535	0.16956	-1.28276	-1.07533	1.15876	0.72911	1.44203	0.74397	-1.09892	0.63982	1.16448	-1.03614	-1.164	-0.84442	0.06244	0.70082	-0.90539	-1.36819	0.32992	-1.15453	0.33432	-1.79066	0.65444	-1.58358	1.07847
ABA5	0.77283	1.16917	0.71661	-0.91378	0.95146	1.30222	1.83735	-0.27283	0.74616	-0.92638	0.61549	0.48493	0.4226	1.13122	-0.37421	0.31306	0.15572	0.90549	1.62594	0.69434	-0.39233	0.84049	-0.5672	0.45434	2.20299	-0.0325	-0.56567	-1.03153	0.64816	1.14128	1.31388	0.5443	-1.09917	0.76177	0.77956	0.46775	-1.15886	0.24711	1.03713	1.13559	-0.83536	-0.6505	0.2213	0.67076	0.66266	-1.56101	0.9423	-1.10596	0.93155
ABA6	0.68848	1.07382	1.2706	-0.93222	0.77597	0.78183	1.17128	-1.50842	0.97806	-0.99719	1.62171	0.88705	-1.23461	1.13072	1.11458	1.52659	1.17121	1.21998	0.49861	2.26189	1.30493	0.80333	-0.53555	0.49906	1.83317	0.24546	0.00159	-0.76567	1.01557	1.27211	1.22165	0.6458	-1.10679	0.69654	1.10511	1.56861	0.93306	-1.07741	0.1773	1.41167	-0.91331	0.1526	1.52651	0.47693	1.11253	1.78759	1.13104	-1.10796	0.96472
ABA7	0.10764	0.70389	1.06718	-0.88888	0.97447	0.98717	0.36509	-0.23673	1.44366	-0.92554	1.82053	1.37727	-0.27908	1.0169	1.21651	0.2878	0.8107	0.64997	0.20809	0.54612	-0.3653	0.38547	-0.95355	0.47683	-0.59589	1.3941	0.11739	-0.75011	1.08113	0.56625	1.54377	0.7074	-1.10613	1.22097	1.03978	0.11654	-1.37515	1.87265	1.57016	0.32793	-1.16532	0.43079	0.58415	1.84031	1.18781	0.84072	1.06575	-0.8925	0.93248
ABA8	0.49802	1.16014	1.20137	-0.86757	1.24916	1.04227	1.09284	0.56168	0.66295	-0.82892	1.0089	1.23608	-1.25929	0.27661	-0.40728	1.59867	1.18094	0.87766	1.61478	0.32191	-0.92031	0.67171	-0.63794	0.12733	0.32778	-0.00179	-0.18821	-0.99821	1.28814	0.86557	0.89479	1.04514	-0.91142	0.69228	1.19786	1.16999	0.08041	0.86838	1.72305	0.34648	-0.84761	1.13579	1.70858	0.09174	1.21072	1.34528	1.01071	-0.64034	0.9126
ABA9	1.18433	0.91532	1.06201	-0.99662	0.8855	1.17592	0.93086	0.0226	1.43174	-0.99719	0.2289	0.41635	0.24874	1.29655	2.08899	1.04172	1.42199	0.45579	0.49258	0.84387	-0.58395	1.09244	-0.83199	0.57617	-0.27116	0.18478	-1.53208	-1.03053	1.17892	1.28872	1.32935	0.47084	-0.68747	0.79048	0.71458	1.53737	0.51388	1.60341	1.12154	1.52115	-1.11719	0.52767	-0.13381	-0.14183	1.49672	0.8721	0.94218	-1.62094	1.05852
ABA10	1.08942	1.00879	1.23587	-0.89718	0.67537	0.9704	0.69813	-1.29448	0.78695	-0.96195	1.11746	1.31155	-0.60884	1.42003	1.03971	0.81319	0.85789	0.76377	0.9892	0.24243	0.16696	-0.55886	-0.52642	1.58679	1.55071	1.43678	-0.52749	-1.03696	1.03079	0.54785	1.00246	0.58168	-0.89934	1.30479	1.16064	0.83991	-1.21996	-0.02265	0.38028	0.54329	-1.01533	-1.24081	-0.86226	0.67058	1.4421	-0.98739	0.88177	-0.97388	1.05595
ABA11	0.11868	0.77677	0.97706	-1.08418	1.15264	0.56736	0.77912	-1.19698	1.22297	-0.98697	1.22602	0.34798	0.82817	1.77956	1.07029	1.01846	1.56051	1.14416	0.43128	0.54619	2.36505	-0.6292	-0.65822	-0.0739	0.35086	0.16642	0.68347	-1.13982	0.66331	1.26967	0.47787	1.38681	-1.05561	0.73668	0.72442	1.72262	0.6523	0.87285	0.57336	1.31343	-0.86256	-0.86695	-0.88858	0.9708	0.79891	-1.00884	0.64839	-1.02725	1.25394
ABA12	0.89612	0.73086	0.89205	-1.10616	1.5201	0.83368	1.61841	-0.32883	0.68768	-0.96407	1.10978	0.54695	-0.98463	0.28833	0.36734	1.18371	0.45242	0.75262	0.59481	1.68253	0.12004	-1.03714	-0.47235	0.26842	-0.63259	0.35794	-1.1282	-1.10491	1.29761	1.19937	0.55358	0.647	-1.14524	1.00047	1.12055	0.64786	-1.44422	-0.45159	0.4047	1.42261	-0.83477	-0.62561	0.43669	-1.33196	1.07488	-0.71823	0.71802	-1.08528	1.09347
ABA13	1.87112	0.76149	1.07969	-0.95687	0.98518	1.29824	1.0491	0.64628	0.48637	-1.05569	0.30895	1.37241	-0.41978	0.90457	1.60002	0.41144	-0.19357	1.29564	1.64942	0.56678	-0.09815	-1.2156	-1.03533	-0.03393	0.58687	1.11967	0.22609	-0.74629	0.585	0.61944	1.42432	0.24383	-0.78348	1.18256	0.88774	0.13492	1.0297	1.17419	0.48339	0.80661	-1.01314	-0.16195	1.93188	-1.13587	0.61766	-0.53984	1.12566	-0.77376	0.77897
ABA14	0.37693	0.91037	1.09724	-0.92114	0.95143	1.20997	0.13118	-0.39741	1.23159	-1.09715	0.51445	0.40154	1.12619	0.89325	-0.26178	1.21352	1.45891	0.95262	1.43404	0.50276	-0.41706	-1.27817	-0.75135	-0.07377	-0.30118	1.87378	1.30078	-0.99814	0.87947	0.79562	0.33808	0.5443	-0.90432	1.19332	1.20395	-0.06742	0.78813	-0.21104	0.14329	0.54358	-1.09705	0.10111	-0.88325	-0.12595	0.8832	-0.30495	1.08266	-0.72239	0.96369
ABA15	0.73373	1.35373	0.60572	-0.91936	0.6318	0.49601	0.89578	1.29941	0.36283	-0.91485	0.20883	0.89161	-1.64327	0.7091	0.09406	1.0167	0.89887	1.4701	0.07232	0.90937	-0.1497	0.11859	-0.24133	-1.45675	0.32785	2.08421	-0.56926	-0.82789	0.66669	1.15271	0.7496	1.80164	-0.96981	1.18636	0.78567	0.34572	0.01955	0.84914	1.50214	0.56299	-0.83218	0.35075	0.55285	1.4638	0.86233	1.84305	1.08218	-0.58564	1.05869
[truncated: 2 more columns]
